# Supplementary material for: To the Editor; A Commentary on “Switching From Originator to Biosimilar Human Growth Hormone Using a Dialogue Teamwork: Single-Center Experience From Sweden”
Source: Springer Nature journal article supplement (doi:10.1007/s13554-014-0015-3), 2014-04-22
Supplement: MOESM1 [file 9270866]

- The manuscript by Flodmark *et al* recently published in the journal *Biologics in Therapy* describes a single center experience in Sweden of a switch from an originator biologic to a biosimilar human growth hormone (rhGH).
- Flodmark *et al* concluded that patients were successfully switched with no negative impact on growth and no serious or unexpected adverse drug reactions.
- Unfortunately, the authors fail to mention several limitations to their study which call into question their conclusions.
  - It is unclear from either the current or the previously published manuscript whether the applied model has been suitably validated using an appropriate study population, with adequate sample sizes and suitable treatment duration.
  - Given the heterogeneity in the diagnoses and pubertal status of the population treated with growth hormone, it is not clear whether the same prediction model would be appropriate for the different patient or diagnostic groups included in the current analysis
  - It is also unclear how repeated measures for each individual patient were addressed, given that these affect the reporting of  $R^2$  and standard deviation (SD) and can lead to spurious results.
  - Hey-Hadavi *et al* reported 8 device-related ADRs in 7 out of 137 subjects (5.1%; injection-site hematoma in 3 and injection-site pain in 5). Compared to this number we find the rate of 18 cases in 98 patients (18.4%) rather high.

This summary slide represents the opinions of the authors. Article processing charges for this commentary were funded by Pfizer. For a full list of acknowledgments and conflicts of interest for all authors of this article, please see the full text online. Copyright © The Authors 2014. Creative Commons Attribution Noncommercial License (CC BY-NC).
